# Supplementary material for: Sheng-Mai-Yin inhibits doxorubicin-induced ferroptosis and cardiotoxicity through regulation of Hmox1
Source: Aging (Albany NY). 2023 Sep 28;15(19):10133–45. doi: 10.18632/aging.205062 (PMC10599746; doi:10.18632/aging.205062)
Supplement: Supplementary Figures [file aging-15-205062-s002.pdf]

## SUPPLEMENTARY FIGURES

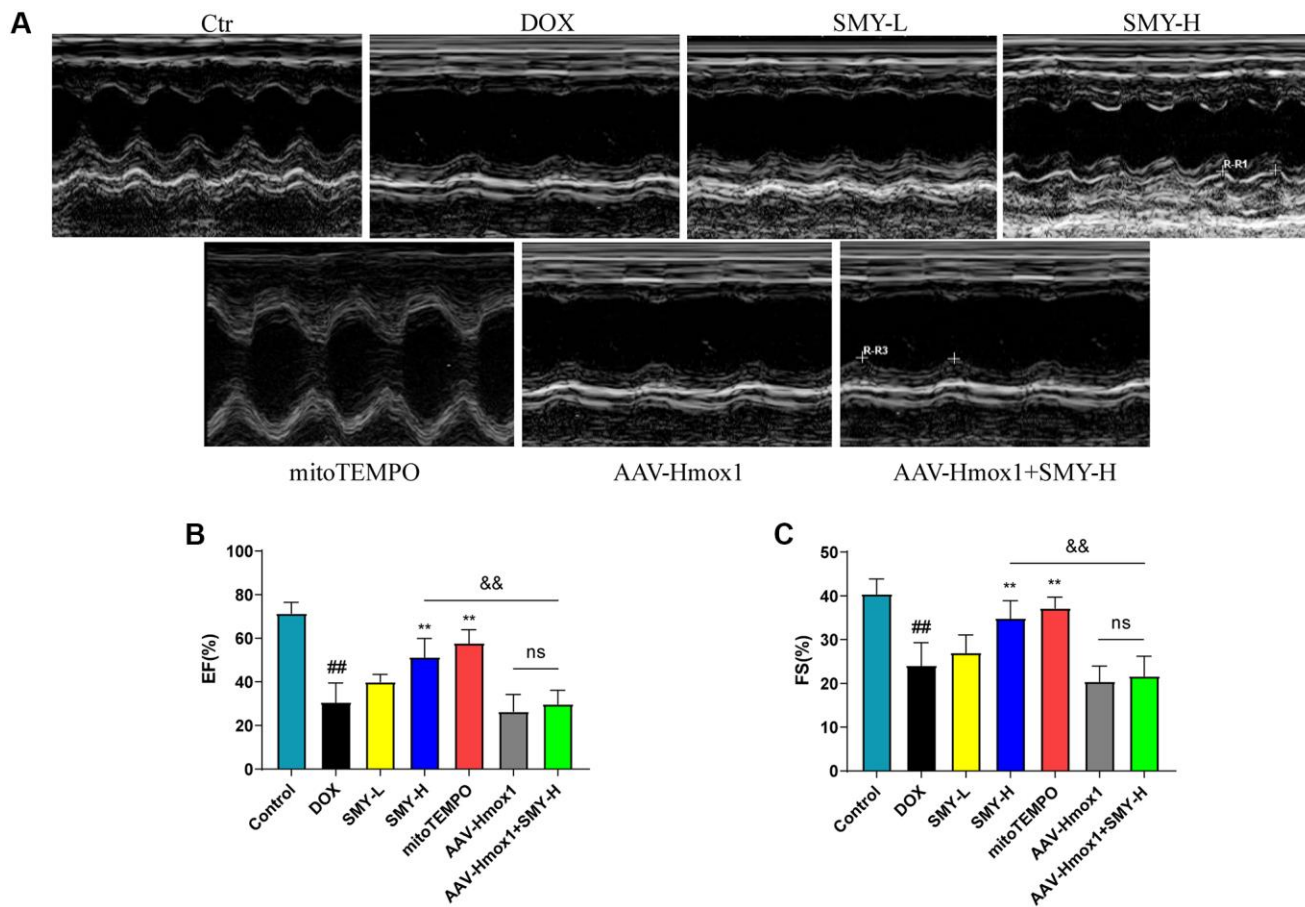

**Supplementary Figure 1. Echocardiography analysis for evaluating cardiac function.** (A) Representative images of echocardiography. (B) EF values of different groups. (C) FS values of different groups. The results were presented as mean  $\pm$  SEM. ## means compared with control group,  $P < 0.01$ ; \* means compared with DOX group,  $P < 0.05$ , \*\* means compared with DOX group,  $P < 0.01$ , && means between the indicated groups,  $P < 0.01$ , ns means no significance between the indicated groups.

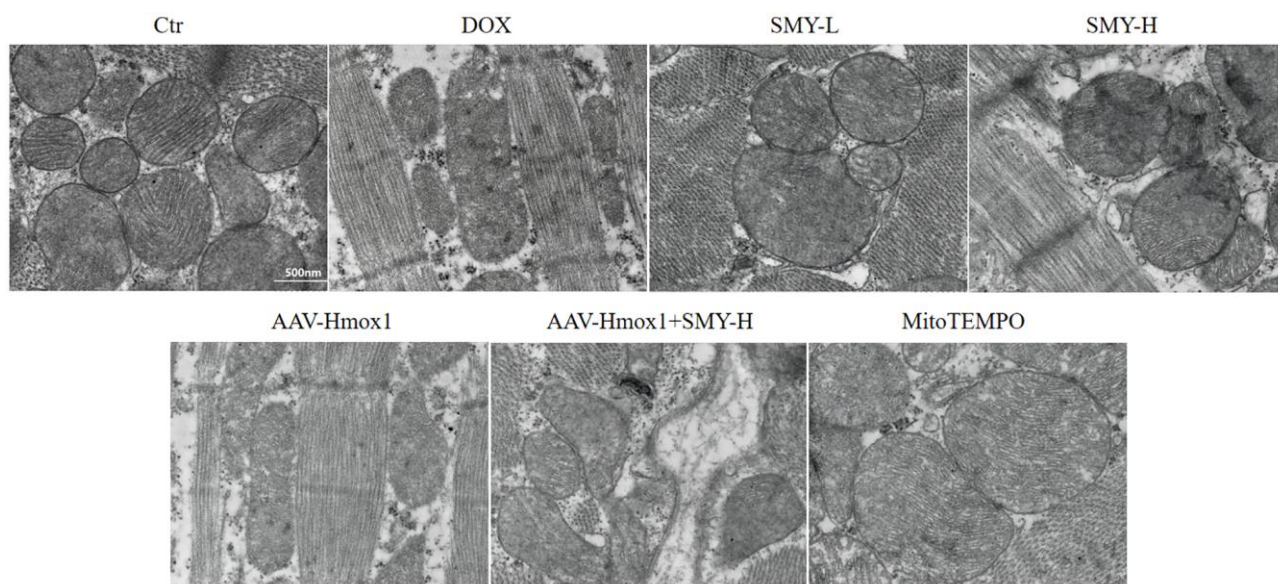

**Supplementary Figure 2. Representative mitochondrial TEM images of heart tissues in different groups.**

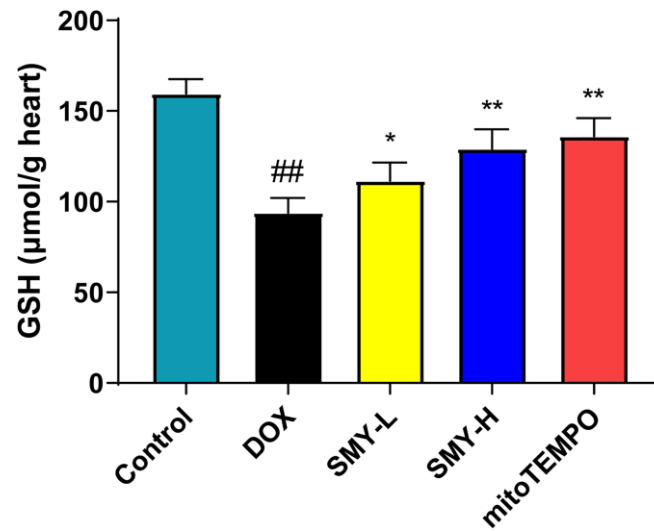

Supplementary Figure 3. GSH levels detected by commercial kits in heart tissues.
